# Supplementary material
Source: PubMed Central journal article supplement (PMC2953942)
Supplement: NIHMS103449-supplement-01.pdf [file NIHMS103449-supplement-01.pdf]

**SUPPLEMENTAL DATA - Price et al.****Engineered cell surface expression of membrane immunoglobulin  
as a means to identify monoclonal antibody-secreting hybridomas****Supplemental Table 1****Primers for V-region sequencing**

| <b>Primer Name</b> | <b>Location</b>                                                        |
|--------------------|------------------------------------------------------------------------|
|                    | <b>Antisense outside primers in constant regions (first round PCR)</b> |
| IgMV1A             | ATGGCCACCAGATTCTTATCAGACA                                              |
| IgDV1A             | TGGCTCCCAGCTGATTTTCA                                                   |
| IgG3V1A            | TTTACAGTTACCGGCTCAGGGAAGTA                                             |
| IgG1V1A            | TTCCAGGTCACTGTCACTGGCTCAGGGAAA                                         |
| IgG2bV1A           | ACTGACTCAGGGAAGTAGCCCTTGA                                              |
| IgG2aV1A           | AGAGTTCCAGGTCAAGGTCACTGGCTCA                                           |
| IgEV1A             | ACAGGACCAGGGAAGTAGTCCTTTACCA                                           |
| IgAV1A             | AGCCGATTATCACTGGGTCACCTGACA                                            |
|                    | <b>Antisense inside primers in constant regions (second round PCR)</b> |
| IgMV2A             | TCTCGCAGGAGACGAGGGGAAGACATT                                            |
| IgDV2A             | AATTACTAAACAGCCCAGGTTT                                                 |
| IgG3V2A            | TTGACAAGGCATCCCAGTGTACCCGAGGAT                                         |
| IgG1V2A            | AGGCATCCCAGGGTCACCATGGAGTT                                             |
| IgG2bV2A           | ATCCCAGAGTCACGGAGGAACCAGT                                              |
| IgG2aV2A           | AACCCTTGACCAGGCATCCTAGAGTCA                                            |
| IgEV2A             | TCATGGAAGCAGTGCCTTTACAGGGCTTCA                                         |
| IgAV2A             | AGCTGGTGGGAGTGTGTCAGTGGGTAGAT                                          |
|                    | <b>Sense primers in signal sequence<sup>a</sup></b>                    |
| MH1                | AATSARGTNMAGCTGSAGSAGTC                                                |
| MH2                | AATSARGTNMAGCTGSAGSAGTCWGG                                             |

|       | <b>Sense primers in leader region<sup>b</sup></b> |
|-------|---------------------------------------------------|
| HLV3S | ACAGNCHCTGAASACASTGANYCYHAMSAT                    |
| HLV4S | AWYSARNMNTGAACASRGWMMHNTCAMCAT                    |

<sup>a</sup> Primers from Wang et al (1999)

<sup>b</sup> Degenerate primers HLV3S and HLV4S were derived from the leader regions of IgG1 two mouse sequences (Accession #BC033451 and BC024405, respectively) and related sequences in the mouse database.

### Supplemental Figure Legend 1.

**Characterization of monoclonal antibodies from two ARP5 fusions.** The ARP5-specific monoclonal antibodies were characterized. **A.** and **B.** HC V-region sequences obtained for hybridomas obtained from two SP2ab fusions with spleens from recombinant ARP5 immunized mice. Framework (FWR) and Complementarity-Determining Regions (CDR) are indicated. **C.** Western blot analysis of these monoclonal antibodies using partially purified recombinant ARP5 resolved on a SDS-PAGE on a 12% gel. Western blot analysis was performed as described in Kandasamy et al. (1999).

The rapid PCR sequencing protocol for the HC V-region (A & B) was performed as follows. Half-nested PCR was used to amplify the heavy chain V-region cDNA prior to sequencing. RNA was prepared from  $5 \times 10^6$  hybridoma cells using Shredder Kit #79654 and RNeasy Kit #74104 in succession (Qiagen, Inc., Valencia, CA). Invitrogen's Superscript III First Strand Synthesis Kit #18080-051 (Carlsbad, CA) and an oligo-dT primer were used to prepare cDNA. PCR and sequencing primers are described in **Supplemental Table 1**. PCR amplifications were performed using EX-Taq #RR001A (Takara BioInc., Madison, WI). An equal mixture MH1 and MH2 degenerate sense primers located in the signal sequence were used in amplifying the majority of V-region sequences (Wang et al., 1999). As an alternative, we designed degenerate sense primers HLV3S or HLV4S located in the mRNA leader region, which worked more effectively on most IgM clones. Nested pairs of antisense primers, specific for each isotype, located approximately 100 and 50 bp inside the constant region, were used in succession during the two rounds of PCR. The same degenerate sense primer was used in both PCR reactions. The inside antisense constant region primer was used during sequencing. This technique offered the advantage that PCR products were sequenced directly without prior molecular cloning. This saved time and effort, but also prevented the analysis of cloned mutant cDNAs that may be generated during PCR.

A

```
13G6IgM aaacatgAatgTaaCTGgATAcTtcctTTtAtt.CtGTcGGTAActTcaggGgtcTaCtcAGaggtTcaG
15G12IgM aaacatgAatgTaaCTGgATAcTtcctTTtAtt.CtGTcGGTAActTcaggGgtcTaCtcAGaggtTcaG
14E12IgM aNcatgAatgTaaCTGgATAcTtcctTTtAtt.CtGTcGGTAActTcaggGgtcTaCtcAGaggtTcaG
15B8IgM aaacatgAatgTaaCTGgATAcTtcctTTtAtt.CtGTcGGTAActTcaggGgtcTaCtcAGaggtTcaG
7C2IgG2A aaacatgggatgga.gtttatcatcctcC.cttggtagcaaacgctacaggtgtccaTtcccaggtgcaa
8A7IgG2A aaacatgggatgga.gtttatcatcctcC.cttggtagcaaacgctacaggtgtccaTtcccaggtgcaa
9F2IgG2A aaacatgggatgga.gtttatcatcctcC.cttggtagcaaacgctacaggtgtccaTtcccaggtgcaa
8G8IgG2A aaacatgggatgga.gtttatcatcctcC.cttggtagcaaacgctacaggtgtccaTtcccaggtgcaa
7F4IgG2A aaacatgggatgga.gtttatcatcctcC.cttggtagcaaacgctacaggtgtccaTtcccaggtgcaa
3D4IgG2B aaacatgNgatggaGgttTtatcatcctcT.cttggtagcaaacgctacaggtgtccaTtcccaggtgcaa

-----FWR1-----
13G6IgM ctCagcagTctgggActgTgctggCAAGcctggggcTtcagtgaagatgtcctgCAaggcttctggct
15G12IgM ctCagcagTctgggActgTgctggCAAGcctggggcTtcagtgaagatgtcctgCAaggcttctggct
14E12IgM ctCagcagTctgggActgTgctggCAAGcctggggcTtcagtgaagatgtcctgCAaggcttctggct
15B8IgM ctCagcagTctgggActgTgctggCAAGcctggggcTtcagtgaagatgtcctgCAaggcttctggct
7C2IgG2A ctgCagcagCctggggctgagctggTgaagcctggggcctcagtgaagatgtcctgTCaggcttctggct
8A7IgG2A ctgCagcagCctggggctgagctggTgaagcctggggcctcagtgaagatgtcctgTCaggcttctggct
9F2IgG2A ctgCagcagCctggggctgagctggTgaagcctggggcctcagtgaagatgtcctgTCaggcttctggct
8G8IgG2A ctgCagcagCctggggctgagctggTgaagcctggggcctcagtgaagatgtcctgTCaggcttctggct
7F4IgG2A ctgCagcagCctggggctgagctggTgaagcctggggcctcagtgaagatgtcctgTCaggcttctggct
3D4IgG2B ctgCagcagTctgggActgTgctggCAAGcctggggcTtcagtgaagatgtcctgCAaggcttctggct

-----CDR1-----FWR2-----
13G6IgM acacCtttaCcaGCTactGGatgcactgggtTaaaAcagagGcctggacagggTctggaatggattggGgc
15G12IgM acacCtttaCcaGCTactGGatgcactgggtTaaaAcagagGcctggacagggTctggaatggattggGgc
14E12IgM acacCtttaCcaGCTactGGatgcactgggtTaaaAcagagGcctggacagggTctggaatggattggGgc
15B8IgM acacCtttaCcaGCTactGGatgcactgggtTaaaAcagagGcctggacagggTctggaatggattggGgc
7C2IgG2A acacatttaCcaAtgactatAtgcactgggtTaaaGcagagaCctggacagggcctggaatggattggagg
8A7IgG2A acacatttaCcaAtgactatAtgcactgggtTaaaGcagagaCctggacagggcctggaatggattggagg
9F2IgG2A acacatttaCcaAtgactatAtgcactgggtTaaaGcagagaCctggacagggcctggaatggattggagg
8G8IgG2A acacatttaCcaAtgactatAtgcactgggtTaaaGcagagaCctggacagggcctggaatggattggagg
7F4IgG2A acacatttaCcaAtgactatAtgcactgggtTaaaGcagagaCctggacagggcctggaatggattggagg
3D4IgG2B acacattttCcaGtgacAcAtgcactgggtTaaaAcagagaCctggacagggcctggaatggattggagg

-----CDR2-----
13G6IgM tattttaCccTggaaatAgTgatactAGctacaaCagaaGttcaaGggcaAgggccaAaCtgactgCagTc
15G12IgM tattttaCccTggaaatAgTgatactAGctacaaCagaaGttcaaGggcaAgggccaAaCtgactgCagTc
14E12IgM tattttaCccTggaaatAgTgatactAGctacaaCagaaGttcaaGggcaAgggccaAaCtgactgCagTc
15B8IgM tattttaCccTggaaatAgTgatactAGctacaaCagaaGttcaaGggcaAgggccaAaCtgactgCagTc
7C2IgG2A tattttaCccaggaatggTgatactCctacaatCagaaattcaaaGggcaGggccacagtgactgTagac
8A7IgG2A tattttaCccaggaatggTgatactCctacaatCagaaattcaaaGggcaGggccacagtgactgTagac
9F2IgG2A tattttaCccaggaatggTgatactCctacaatCagaaattcaaaGggcaGggccacagtgactgTagac
8G8IgG2A tattttaCccaggaatggTgatactCctacaatCagaaattcaaaGggcaGggccacagtgactgTagac
7F4IgG2A tattttaCccaggaatggTgatactCctacaatCagaaattcaaaGggcaGggccacagtgactgTagac
3D4IgG2B tatttCtTTAggaatgAgtgatactCctacaatCagaaattcaaaGggcaAgggccaAAtgactgCagag

-----FWR3-----
13G6IgM aCAtccAccagCacTgcctacatgGagctcaGcagcctgacaAAAtgaggact.ctgCGgtctattactgt
15G12IgM aCAtccAccagCacTgcctacatgGagctcaGcagcctgacaAAAtgaggact.ctgCGgtctattactgt
14E12IgM aCAtccAccagCacTgcctacatgGagctcaGcagcctgacaAAAtgaggact.ctgCGgtctattactgt
15B8IgM aCAtccAccagCacTgcctacatgGagctcaGcagcctgacaAAAtgaggact.ctgCGgtctattactgt
7C2IgG2A aaatcctccagCacagcctacatgGagctcaAacgcctgacatctgaggact.ctgCGgtctattactgt
8A7IgG2A aaatcctccagCacagcctacatgGagctcaAacgcctgacatctgaggact.ctgCGgtctattactgt
9F2IgG2A aaatcctccagCacagcctacatgGagctcaAacgcctgacatctgaggact.ctgCGgtctattactgt
8G8IgG2A aaatcctccagCacagcctacatgGagctcaAacgcctgacatctgaggact.ctgCGgtctattactgt
7F4IgG2A aaatcctccagCacagcctacatgGagctcaAacgcctgacatctgaggact.ctgCGgtctattactgt
3D4IgG2B aaatcctccAaCacagcctacatgGagctcaGcagcctgacatctgaggNctCctgCGgtctattactgt

-----
13G6IgM AcaCgggTAACtACCGctAtgctATggAcTAcTgGGGTCAAGGaACctcAGtCACCNcTCCTCAGaGa-
15G12IgM AcaCgggTAACtACCGctAtgctATggAcTAcTgGGGTCAAGGaACctcAGtCACCNcTCCTCAGaGa-
14E12IgM AcaCgggTAACtACCGctAtgctATggAcTAcTgGGGTCAAGGaACctcAGtCACCGTCTCTCAGaGAGa-
15B8IgM AcaCgggTAACtACCGctAtgctATggAcTAcTgGGGTCAAGGaACctcAGtCACCNcTCNCAGaGa-
7C2IgG2A gcaagAggggggt.ttactt.ActggggCcgagggActctggTCacTgtctCtgCagccaaaa.caacag
8A7IgG2A gcaagAggggggt.ttactt.ActggggCcgagggActctggTCacTgtctCtgCagccaaaa.caacag
9F2IgG2A gcaagAggggggt.ttactt.ActggggCcgagggActctggTCacTgtctCtgCagccaaaa.caacag
8G8IgG2A gcaagAggggggt.ttactt.ActggggCcgagggActctggTCacTgtctCtgCagccaaaa.caacag
7F4IgG2A gcaagAggggggt.ttactt.ANctggggCcgagggActctggTCacTgtctCtgCagccaaaa.Ccaacag
3D4IgG2B gcaagAggggggt.ttacttTgctggggAcGAggGAtctCTGGTCACtGtTcTTCGCaGcCaAAaA
```





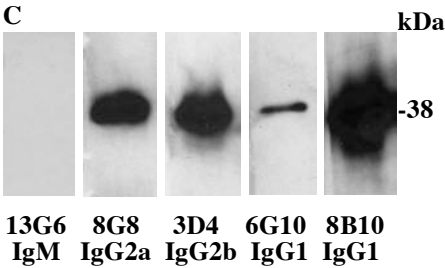

### **Supplemental References**

Kandasamy, M.K., McKinney, E.C., Meagher, R.B. 1999. The late pollen-specific actins in angiosperms. *Plant J* 18, 681.

Wang, B., Chen, Y.B., Ayalon, O., Bender, J., Garen, A. 1999. Human single-chain Fv immunoconjugates targeted to a melanoma-associated chondroitin sulfate proteoglycan mediate specific lysis of human melanoma cells by natural killer cells and complement. *Proc Natl Acad Sci U S A* 96, 1627.
